1 **Early epidemiological assessment of the transmission**  
2 **potential and virulence of coronavirus disease 2019**  
3 **(COVID-19) in Wuhan City: China, January-February,**  
4 **2020**

5 **Authors:** Kenji Mizumoto<sup>1,2,3</sup> §, Katsushi Kagaya<sup>2,4</sup>, Gerardo Chowell<sup>3</sup>

6 **Affiliations:**

7 <sup>1</sup> Graduate School of Advanced Integrated Studies in Human Survivability, Kyoto  
8 University Yoshida–Nakaadachi–cho, Sakyo–ku, Kyoto, Japan

9 <sup>2</sup> Hakubi Center for Advanced Research, Kyoto University, Yoshidahonmachi,  
10 Sakyo–ku, Kyoto, Japan;

11 <sup>3</sup> Department of Population Health Sciences, School of Public Health, Georgia State  
12 University, Atlanta, Georgia, USA

13 <sup>4</sup> Seto Marine Biological Laboratory, Field Science, Education and Research Center,  
14 Kyoto University, Shirahama–cho, Nishimuro–gun, Wakayama 649–2211 Japan

15

16 §Corresponding author

17 Email addresses:

18 KM: [mizumotokenji@gmail.com](mailto:mizumotokenji@gmail.com), KK: [kagaya.katsushi.8e@kyoto-u.ac.jp](mailto:kagaya.katsushi.8e@kyoto-u.ac.jp), GC:

19 [gchowell@gsu.edu](mailto:gchowell@gsu.edu)

20 **Article type:**

21 Original Research

22 **Word count:**

23 Abstract: 350 (Max 350)

24 Main: 2768

25 **Abstract**

26 **Background:**

27 Since the first cluster of cases was identified in Wuhan City, China, in December, 2019,  
28 coronavirus disease 2019 (COVID-19) has rapidly spread across China, causing  
29 multiple introductions in 109 countries/territories/areas as of March 10<sup>th</sup>. Despite the  
30 scarcity of publicly available data, scientists around the world have made strides in  
31 estimating the magnitude of the epidemic, the basic reproduction number, and  
32 transmission patterns. Recently more evidence suggests that a substantial fraction of the  
33 infected individuals with the novel coronavirus show little if any symptoms, which  
34 suggest the need to reassess the transmission potential of this emerging disease. In this  
35 study, we derive estimates of the transmissibility and virulence of COVID-19 in Wuhan  
36 City, China, by reconstructing the underlying transmission dynamics using multiple  
37 data sources.

38 **Methods:**

39 We employ statistical methods and publicly available epidemiological datasets to jointly  
40 derive estimates of transmissibility and severity associated with the novel coronavirus.  
41 For this purpose, the daily series of laboratory–confirmed COVID-19 cases and deaths  
42 in Wuhan City and epidemiological data of Japanese evacuees from Wuhan City on

43 board government–chartered flights were integrated into our analysis.

44 **Results:**

45 Our posterior estimates of basic reproduction number ( $R$ ) in Wuhan City, China in  
46 2019–2020 reached values as high as 5.20 (95%CrI: 5.04–5.47) and the enhanced public  
47 health intervention after January 23<sup>rd</sup> in 2020 was associated with a declined  $R$  at 0.58  
48 (95%CrI: 0.51–0.64), with the total number of infections (i.e. cumulative infections)  
49 estimated at 1905526 (95%CrI: 1350283– 2655936) in Wuhan City, raising the  
50 proportion of infected individuals to 19.1% (95%CrI: 13.5–26.6%). We also found that  
51 most recent crude infection fatality ratio (IFR) and time–delay adjusted IFR is estimated  
52 to be 0.04% (95% CrI: 0.03%–0.06%) and 0.12% (95%CrI: 0.08–0.17%), which is  
53 several orders of magnitude smaller than the crude CFR estimated at 4.19%

54 **Conclusions:**

55 We have estimated key epidemiological parameters of the transmissibility and virulence  
56 of COVID-19 in Wuhan, China during January-February, 2020 using an ecological  
57 modelling approach. The power of our approach lies in the ability to infer  
58 epidemiological parameters with quantified uncertainty from partial observations  
59 collected by surveillance systems.

60 **Keywords:** epidemic; transmissibility; mathematical model; COVID-19; China

61

## 62 **Background**

63           The novel coronavirus (COVID-19) emerging from China is a deadly  
64 respiratory pathogen that belongs to the same family as the coronavirus responsible for  
65 the 2002-2003 Severe Acute Respiratory Syndrome (SARS) outbreaks [1]. Since the  
66 first cluster of cases was identified in Wuhan City, China, in December, 2019,  
67 COVID-19 has rapidly spread across China as well as caused multiple introductions in  
68 109 countries/territories/areas as of March 10<sup>th</sup>, 2020 [2]. Nevertheless, China has been  
69 hit hard by this emerging infectious disease, especially the city of Wuhan in Hubei  
70 Province, where the first cluster of severe pneumonia caused by the novel virus was  
71 identified. Meanwhile, the cumulative number of laboratory and clinically confirmed  
72 cases and deaths in mainland China has reached 80778 and 3158, respectively, as of  
73 March 10<sup>th</sup>, 2020 [3].

74           Because the morbidity and mortality burden associated with the novel  
75 coronavirus has disproportionately affected the city of Wuhan, the center of the epidemic  
76 in China, the central government of the People's Republic of China imposed a lockdown  
77 and social distancing measures in this city and surrounding areas starting on January  
78 23<sup>rd</sup> 2020. Indeed, out of the 80778 COVID-19 cases reported in China, 49978 cases  
79 (61.9%) are from Wuhan City. In terms of the death count, a total of 2423 deaths  
80 (76.7%) have been recorded in Wuhan city out of the 3158 deaths reported throughout  
81 China. To guide the effectiveness of interventions, it is crucial to gauge the uncertainty  
82 relating to key epidemiological parameters characterizing the transmissibility and the  
83 severity of the disease. Despite the scarcity of publicly available data, scientists around  
84 the world have made strides in estimating the magnitude of the epidemic, the basic  
85 reproduction number, and transmission patterns [4-5]. Moreover, accumulating evidence

86 suggests that a substantial fraction of the infected individuals with the novel coronavirus  
87 show little if any symptoms, which suggest the need to reassess the transmission  
88 potential of this emerging disease [6]. For this purpose, in this study we employ  
89 statistical methods and publicly available epidemiological datasets to jointly derive  
90 estimates of transmissibility and severity associated with the novel coronavirus.

91

## 92 **Methods**

### 93 **Epidemiological data**

94 We linked our model to two different datasets. First, the daily series of  
95 laboratory-confirmed nCov cases and deaths in Wuhan City were extracted according to  
96 date of symptoms onset or reporting date from several sources [3, 7-8]. Our analysis  
97 relies on epidemiological data reported prior to February 11<sup>th</sup>, 2020 because of the  
98 change in case definition that was announced on February 12<sup>th</sup>, 2020 [9]. As of  
99 February 11<sup>th</sup>, 2020, a total of 19559 confirmed cases including 820 deaths were  
100 reported in Wuhan City. Second, epidemiological data of Japanese evacuees from  
101 Wuhan City on board government-chartered flights were obtained from the Japanese  
102 government. After arriving in Japan, all of the Japanese evacuees were kept in isolation  
103 for about 14 days and examined for infection using polymerase chain reaction (PCR)  
104 tests [7]. As of February 11<sup>th</sup>, a total of four flights with the Japanese evacuees left  
105 Wuhan City. We collected information on the timing of the evacuee flights that left  
106 Wuhan City as well as the number of passengers that tested positive for COVID-19 in  
107 order to calibrate our model (Table S1).

108

109 **Statistical analysis**

110 Using the following integral equation model, we estimate the reproduction  
111 number of COVID-19. Here, infected and reported cases are denoted by  $i$  and  $c$ ,  
112 respectively.

113 We connected the daily incidence series with a discrete-time integral equation  
114 to describe the epidemic dynamics. Let  $g_s$  denote the probability mass function of the  
115 serial interval, e.g., the time from illness onset in a primary case to illness onset in the  
116 secondary case, of length  $s$  days, which is given by

$$g_s = G(s) - G(s - 1) ,$$

117 For  $s > 0$  where  $G(\cdot)$  represents the cumulative distribution function of the gamma  
118 distribution. Mathematically, we describe the expected number of new cases with day  $t$ ,  
119  $E[c(t)]$  as follows,

$$E[c(t)] = \sum_{s=1}^{\infty} E[c(t-s)]R,$$

120 where  $E[c(t)]$  represents the expected number of new cases with onset day  $t$ , where  $R$   
121 represents the average number of secondary cases per case.

122 Subsequently, we also employed the time-dependent variation in  $R$  to take into  
123 account the impact of enhanced interventions on the transmission potential. This time  
124 dependence was modelled by introducing a parameter  $\delta_t$ , which is given by

$$\delta_t = \begin{cases} 1 & \text{otherwise} \\ \beta_1 & \text{if } t = \text{period}_1 \\ \beta_2 & \text{if } t = \text{period}_2 \end{cases}$$

125 where  $\text{period}_1$  and  $\text{period}_2$  represent the corresponding period from January 23<sup>rd</sup> to  
126 February 2<sup>nd</sup> 2020 and from February 3<sup>rd</sup> to February 11<sup>th</sup>, 2020, respectively.  
127 January 23<sup>rd</sup> 2020 is the date when the central government of the People's Republic of

128 China imposed a lockdown in Wuhan and other cities in Hubei in an effort to quarantine  
129 the epicentre of the coronavirus (COVID-19) to mitigate transmission. Furthermore, we  
130 evenly divide the interval into two periods to incorporate the time-dependent effects on  
131  $R$  using the parameters  $\beta_1$  and  $\beta_2$  which scale the extent of the intervention, taking  
132 values smaller than 1 [10].

133 To account for the probability of occurrence,  $\theta$  [11], we assume that the number  
134 of observed cases on day  $t$ ,  $h(t)$ , occurred according to a Bernoulli sampling process,  
135 with the expected values  $E(c_i; H_{t-1})$ , where  $E(c_i; H_{t-1})$  denotes the conditional expected  
136 incidence on day  $t$ , given the history of observed data from day 1 to day  $(t-1)$ , denoted  
137 by  $H_{t-1}$ . Thus, the number of expected newly observed cases is written as follows:

$$E[h(t); H_{t-1}] = \begin{cases} (1 - \theta) + \theta E[c(t); H_{t-1}], & \text{if } h = 0, \\ \theta E[c; H_{t-1}], & \text{otherwise,} \end{cases}$$

138 Further, we model the time-dependent variation in the reporting probability.  
139 This time dependence was modelled by introducing a parameter  $\delta_2$ , which is given by

$$\delta_2 = \begin{cases} \alpha_1, & \text{if } t = \text{period}_3, \\ \alpha_2, & \text{if } t = \text{period}_4, \\ 1, & \text{otherwise,} \end{cases}$$

140 where  $\text{period}_3$  and  $\text{period}_4$  represent the corresponding periods from the start of our  
141 study period to Jan 16 and from Jan 17 to Jan 22, respectively, while  $\alpha_1$  and  $\alpha_2$  scale the  
142 extent of the reporting probability (where  $\alpha_1$  and  $\alpha_2$  is expected to be smaller than 1).  
143 We evenly divide the duration before the lockdown was put in place into two to  
144 incorporate the time dependency of the reporting probability. The number of expected  
145 newly observed cases should be updated as

$$E[h(t); H_{t-1}] = \begin{cases} (1 - \theta) + q\delta\theta E[c(t); H_{t-1}], & \text{if } h_a = 0, \\ q\delta\theta E[c(t); H_{t-1}], & \text{otherwise,} \end{cases}$$

146 We assume the incidence,  $h(t)$  is the result of the Binomial sampling process with the



147 expectation  $E[h]$ . The likelihood function for the time series of observed cases that we  
148 employ to estimate the effective reproduction number and other relevant parameters is  
149 given by:

$$L_1(U; c) = \prod_{t=1}^T \binom{E(h(t); H(t-1))}{c(t)} q^{c(t)} (1-q)^{E(h(t); H(t-1))-c(t)},$$

150 where  $U$  indicates parameter sets that are estimated from this likelihood.

151 Subsequently, the conditional probability of non-infection given residents in  
152 Wuhan City at the time point of  $t_i$ ,  $p_{t_i}$ , was assumed to follow a binomial distribution,  
153 and the likelihood function is given by:

$$L_2(p_{t_i}; M_{t_i}, m_{t_i}) = \binom{M_{t_i}}{m_{t_i}} p_{t_i}^{m_{t_i}} (1-p_{t_i})^{M_{t_i}-m_{t_i}},$$

154 Where  $M_{t_i}$  and  $m_{t_i}$  is the number of government chartered flight passengers and  
155 non-infected passengers at the date of  $t_i$ , respectively, and  $p_{t_i}$  is the proportion of the  
156 estimated non-infected population in Wuhan at the date of  $t_i$ , calculated from the  $h(t)$   
157 and catchment population in Wuhan City [3,13].

158 Serial interval estimates of COVID-19 were derived from previous studies of  
159 nCov, indicating that it follows a gamma distribution with the mean and SD at 7.5 and  
160 3.4 days, respectively, based on ref. [14]. The maximum value of the serial interval was  
161 fixed at 28 days as the cumulative probability distribution of the gamma distribution up  
162 to 28 days reaches 0.999.

163

#### 164 **Infection fatality ratio**

165 Crude CFR and crude IFR is defined as the number of cumulative deaths  
166 divided by the number of cumulative cases or infections at a specific point in time

167 without adjusting the time delay from illness onset or hospitalization to death. Next, we  
 168 employed an integral equation model in order to estimate the real-time IFR. First, we  
 169 estimated the real-time CFR as described elsewhere [15-17]. For the estimation, we  
 170 employ the delay from hospitalization to death,  $f_s$ , which is assumed to be given by  $f_s =$   
 171  $F(s) - F(s-1)$  for  $s > 0$  where  $H(s)$  follows a gamma distribution with mean 10.1 days and  
 172 SD 5.4 days, obtained from the available observed data [18].

$$L_3(\pi; c_t, \theta) = \prod_{t_i} \binom{t_i}{D_{t_i}} \left( \pi \frac{\sum_{t=2}^{t_i} \sum_{s=1}^{t-1} c_{t-s} f_s}{\sum_{t=1}^{t_i} c_t} \right)^{D_{t_i}} \left( 1 - \pi \frac{\sum_{t=2}^{t_i} \sum_{s=1}^{t-1} c_{t-s} f_s}{\sum_{t=1}^{t_i} c_t} \right)^{\sum_{t=1}^{t_i} c_t - D_{t_i}}$$

173 where  $c_t$  represents the number of new cases with reported day  $t$ , and  $D_{t_i}$  is the number  
 174 of new deaths with reported day  $t_i$  [16-18]. We assume that the cumulative number of  
 175 observed deaths,  $D_t$  is the result of the binomial sampling process with probability  $\pi$ .  
 176 Subsequently, crude IFR and time-delay adjusted IFR are calculated using the estimated  
 177  $\pi$  and  $h_t$ .

178 The total likelihood is calculated as  $L=L_1L_2L_3$  and model parameters were  
 179 estimated using a Monte Carlo Markov Chain (MCMC) method in a Bayesian  
 180 framework. Posterior distributions of the model parameters were estimated based on  
 181 sampling from the three Markov chains. For each chain, we drew 100,000 samples from  
 182 the posterior distribution after a burn-in of 20,000 iterations. Convergence of MCMC  
 183 chains were evaluated using the potential scale reduction statistic [19-20]. Estimates and  
 184 95% credibility intervals for these estimates are based on the posterior probability

185 distribution of each parameter and based on the samples drawn from the posterior  
186 distributions. All statistical analyses were conducted in R version 3.5.2 (R Foundation  
187 for Statistical Computing, Vienna, Austria) using the ‘rstan’ package.

188

## 189 **Results**

190 The daily series of COVID-19 laboratory–confirmed incidence and cumulative  
191 incidence in Wuhan in 2019–2020 are displayed in Figure 1. Overall, our dynamical  
192 models yield a good fit to the temporal dynamics (i.e. incidence, cumulative incidence)  
193 including an early exponential growth pattern in Wuhan. In incidence data, a few  
194 fluctuations are seen, probably indicating that the surveillance system likely missed  
195 many cases during the early transmission phase (Figure 1).

196 Our posterior estimates of basic reproduction number ( $R$ ) in Wuhan City, China  
197 in 2019–2020 was estimated to be as high as 5.20 (95%CrI: 5.04–5.47). The  
198 time–dependent scaling factors quantifying the extent of enhanced public health  
199 intervention on  $R$  is 0.99 (95%CrI: 0.94–1.00), declining  $R$  to 5.12 (95%CrI: 4.98–5.26)  
200 from January 23rd to February 1st and 0.11 (95%CrI: 0.10–0.13), declining  $R$  to 0.58  
201 (95%CrI: 0.51–0.64) from February 2<sup>nd</sup> to February 11<sup>th</sup>, 2020. Other parameter  
202 estimates for the probability of occurrence and reporting rate are 0.97 (95% CrI:  
203 0.84–1.00) and 0.010 (95% CrI: 0.007–0.014), respectively. Moreover, the  
204 time–dependent scaling factor quantifying the extent of reporting rate,  $\alpha$ , is estimated to  
205 be 0.08 (95% CrI: 0.03–0.19) before January 16<sup>th</sup> and to be 0.99 (95% CrI: 0.96–1.00)  
206 from January 17<sup>th</sup> to January 22<sup>nd</sup>.

207 The total number of estimated laboratory–confirmed cases (i.e. cumulative  
208 cases) is 18913 (95% CrI: 16444–19705) while the actual numbers of reported

209 laboratory-confirmed cases during our study period is 19559 as of February 11th, 2020.  
210 Moreover, we inferred the total number of COVID-19 infections (Figure S1). Our  
211 results indicate that the total number of infections (i.e. cumulative infections) is  
212 1905526 (95%CrI: 1350283– 2655936).

213 The Observed and posterior estimates of the cumulative number of deaths from  
214 COVID-19 in Wuhan are displayed in Figure 2, and model-based posterior estimates of  
215 the cumulative number of deaths is 820 (95%CrI: 744–900), while actual number of  
216 reported deaths is 820. The estimated temporal variation in the death risk caused by  
217 COVID-19 in Wuhan, China, 2019–2020 is shown in Figure 3 and Figure S2. Observed  
218 and posterior estimated of crude CFR in Wuhan City is presented in Figure 2A, while  
219 observed and posterior estimates of time-delay adjusted CFR is shown in Figure 2B.  
220 Furthermore, Figure 3A and 3B illustrates time-delay no-adjusted IFR and time-delay  
221 adjusted IFR, respectively.

222 The latest estimate of the crude CFR and time-delay adjusted CFR in Wuhan  
223 appeared to be 4.2% (95% CrI: 3.9–4.9%) and 12.2% (95% CrI: 11.4–13.0%),  
224 respectively, whereas the latest model-based posterior estimates of time-delay not  
225 adjusted IFR and adjusted IFR, presented in Figure 3 C and D, are 0.04%(95% CrI:  
226 0.03%–0.06%) and 0.12% (95%CrI: 0.08–0.17%), respectively, while the observed  
227 crude CFR is calculated to be 4.19% (Table 1).

228

## 229 **Discussion**

230 In this study we derived estimates of the transmissibility and virulence of  
231 COVID-19 in Wuhan City, China, by reconstructing the underlying transmission

232 dynamics using multiple data sources. Applying dynamic modeling, the reproduction  
233 number and death risks as well as probabilities of occurrence and reporting rate were  
234 estimated.

235 Our posterior estimates of basic reproduction number ( $R$ ) in Wuhan City, China  
236 in 2019–2020 is calculated to be as high as 5.20 (95%CrI: 5.04–5.47). The  
237 time-dependent scaling factor quantifying the extent of enhanced public health  
238 intervention on  $R$  is 0.99 (95%CrI: 0.94–1.00), declining  $R$  to 5.12 (95%CrI: 4.98–5.26)  
239 from January 23rd to February 1st and 0.11 (95%CrI: 0.10–0.13), declining  $R$  to 0.58  
240 (95%CrI: 0.51–0.64) for February 2nd to February 11th, 2020. These  $R$  estimates  
241 capturing the underlying transmission dynamics modify the impact of COVID-19, with  
242 the total number of infections (i.e. cumulative infections) estimated at 1905526  
243 (95%CrI: 1350283– 2655936) in Wuhan City, raising the proportion of infected  
244 individuals to 19.1% (95%CrI: 13.5–26.6%) with a catchment population in Wuhan  
245 City of 10 million people. Our estimates of mean reproduction number reached values  
246 as high as 5.20, an estimate that is slightly higher than previous mean estimates in the  
247 range 2.2-3.8 derived by fitting epidemic models to the initial growth phase of the  
248 observed case incidence [21-23]. By comparison, the  $R$  estimate for the Diamond  
249 Princess cruise ship in Japan reached values as high as ~11 [24]. Further, these estimates  
250 are higher than recent mean  $R$  estimates derived from the growth rates of the COVID-19  
251 outbreaks in Singapore ( $R\sim 1.1$ ) [25] and Korea ( $R\sim 1.5$ ) [26].

252

253 The sustained high  $R$  values in Wuhan City even after the lockdown and mobility  
254 restrictions suggests that transmission is occurring inside the household or amplified in  
255 healthcare settings [18], which is a landmark of past SARS and MERS outbreaks

256 [27-28]. Considering the potent transmissibility of COVID-19 in confined settings, as  
257 illustrated by COVID-19 outbreaks aboard cruise ships, including the Diamond Princess  
258 cruise ship, where the total number of secondary or tertiary infections reached 705  
259 among more than 3,700 passengers as of February 28<sup>th</sup>, 2020 and also by the COVID-19  
260 outbreak tied to the Shincheonji religious sect in South Korea where church members  
261 appear to have infected from seven to 10 people. [29-31], it is crucial to prevent  
262 transmission in confined settings including hospital-based transmission by  
263 strengthening infection control measures as well as transmission stemming from large  
264 social gatherings.

265         Our most recent estimates of the crude CFR and time-delay adjusted CFR are  
266 at 4.2% (95% CrI: 3.9–4.9%) and 12.23% (95% CrI: 11.4–13.0%), respectively. In  
267 contrast, our most recent crude IFR and time-delay adjusted IFR is estimated to be  
268 0.04% (95% CrI: 0.03%–0.06%) and 0.12% (95%CrI: 0.08–0.17%), which is several  
269 orders of magnitude smaller than the crude CFR at 4.19%. These findings indicate that  
270 the death risk in Wuhan is estimated to be much higher than those in other areas, which  
271 is likely explained by hospital-based transmission [32]. Indeed, past nosocomial  
272 outbreaks have been reported to elevate the CFR associated with MERS and SARS  
273 outbreaks, where inpatients affected by underlying disease or seniors infected in the  
274 hospital setting have raised the CFR to values as high as 20% for a MERS outbreak  
275 [33-34].

276         Public health authorities are interested in quantifying  $R$  and CFR to measure  
277 the transmission potential and virulence of an infectious disease, especially when  
278 emerging/re-emerging epidemics occur in order to decide the intensity of the public  
279 health response. In the context of a substantial fraction of unobserved infections due to

280 COVID-19,  $R$  estimates derived from the trajectory of infections and the IFR are more  
281 realistic indicators compared to estimates derived from observed cases alone [18,  
282 35-36].

283 Our analysis also revealed a high probability of occurrence and quite low  
284 reporting probabilities in Wuhan City. High probability of occurrence in the above  
285 equation suggests that zero observed cases at some point is not due to the absence of  
286 those infected, but more likely due to a low reporting rate. A very low reporting  
287 probability suggests that it is difficult to diagnose COVID-19 cases or a breakdown in  
288 medical care delivery. Moreover, we also identified a remarkable change in the  
289 reporting rate, estimated to be 12-fold lower in the 1<sup>st</sup> period (–Jan 16, 2020) and about  
290 the same during the 2<sup>nd</sup> period (January 17<sup>th</sup> – 22<sup>nd</sup>, 2020), relative to the that  
291 estimated after January 23<sup>rd</sup> 2020.

292

293 Our results are not free from the limitations. First, our methodology aims to capture the  
294 underlying transmission dynamics using multiple data sources. By implementing mass  
295 screening in certain populations is a useful approach to ascertain the real proportion of  
296 those infected and a way of adding credibility to the estimated values. Second, it is  
297 worth noting that the data of Japanese evacuee employed in our analysis is not a random  
298 sample from the Wuhan catchment population. Indeed, it also plausible that their risk of  
299 infection in this sample is not as high as that of local residents in Wuhan,  
300 underestimating the fatality risk.

## 301 **Conclusion**

302 In summary, we have estimated key epidemiological parameters of the

303 transmissibility and virulence of COVID-19 in Wuhan, China, January-February, 2020  
304 using an ecological modelling approach and several epidemiological datasets. The  
305 power of our approach lies in the ability to infer epidemiological parameters with  
306 quantified uncertainty from partial observations collected by surveillance systems.  
307

## 308 **List of abbreviations**

309 CFR: Case fatality ratio, IFR: Infection Fatality ratio, SARS: Severe Acute Respiratory  
310 Syndrome, MERS: Middle East Respiratory Syndrome  
311

## 312 **Additional files**

### 313 **Additional file 1:**

314 **Appendix. Table S1.** Information related to Japanese evacuees from Wuhan City on  
315 board government-chartered flights  
316  
317

## 318 **Declarations**

### 319 **Ethics approval and consent to participate**

320 Not applicable.



321 **Consent for publication**

322 Not applicable.

323 **Availability of data and materials**

324 The present study relies on published data and access information to essential  
325 components of the data are available from the corresponding author.

326 **Competing interests**

327 The authors declare that they have no competing interests.

328

329 **Funding**

330 KM acknowledges support from the Japan Society for the Promotion of Science (JSPS)

331 KAKENHI Grant Number 18K17368 and from the Leading Initiative for Excellent

332 Young Researchers from the Ministry of Education, Culture, Sport, Science &

333 Technology of Japan. KK acknowledges support from the JSPS KAKENHI Grant

334 Number 18K19336 and 19H05330. GC acknowledges support from NSF grant 1414374

335 as part of the joint NSF–NIH–USDA Ecology and Evolution of Infectious Diseases

336 program.

337 **Authors' contributions**

338 KM and GC conceived the early study idea. KM and KK built the model. KM  
339 implemented statistical analysis and wrote the first full draft. GC advised on and helped  
340 shape the research. All authors contributed to the interpretation of the results and edited  
341 and commented on several earlier versions of the manuscript.

342 **Acknowledgements**

343 Not applicable.

344

345 **REFERENCES**

346 1. Jon Cohen. **Mining coronavirus genomes for clues to the outbreak's origins.**

347 **Science.** Jan 31, 2020.

348 [https://www.sciencemag.org/news/2020/01/mining-coronavirus-genomes-clues-](https://www.sciencemag.org/news/2020/01/mining-coronavirus-genomes-clues-outbreak-s-origins)

349 [outbreak-s-origins](https://www.sciencemag.org/news/2020/01/mining-coronavirus-genomes-clues-outbreak-s-origins). Accessed, 3 Feb, 2020

350 2. World Health Organization (WHO). Novel Coronavirus (2019-nCoV) situation

351 reports. Available from:

352 <https://www.who.int/emergencies/diseases/novel-coronavirus-2019/situation-rep>

353 [orts](https://www.who.int/emergencies/diseases/novel-coronavirus-2019/situation-rep) Accessed, [cited 2020 Mar 10]

- 354 3. The State Council, The People's Republic of China. [cited 2020 Mar 10].  
355 <http://www.gov.cn/>
- 356 4. Nishiura H, Jung SM, Linton NM, Kinoshita R, Yang Y, Hayashi K, et al. **The**  
357 **Extent of Transmission of Novel Coronavirus in Wuhan, China, 2020.** *J Clin*  
358 *Med.* 2020; 9(2); 330
- 359 5. Wu JT, Leung K, Leung GM. **Nowcasting and forecasting the potential**  
360 **domestic and international spread of the 2019-nCoV outbreak originating**  
361 **in Wuhan, China: a modelling study.** *Lancet.* 2020. pii:  
362 S0140-6736(20)30260-9. doi: 10.1016/S0140-6736(20)30260-9.
- 363 6. Linton NM, Kobayashi T, Yang Y, Hayashi K, Akhmetzhanov AR, Jung SM, et  
364 al. **Epidemiological characteristics of novel coronavirus infection: A**  
365 **statistical analysis of publicly available case data.** *medRxiv*  
366 2020.01.26.20018754; doi: <https://doi.org/10.1101/2020.01.26.20018754>
- 367 7. Health Commission of Hubei Province, China. [cited 2020 Feb 7].  
368 <http://wjw.hubei.gov.cn/>
- 369 8. Health Commission of Wuhan City, Hubei Province, China [cited 2020 Feb 7]  
370 <http://wjw.hubei.gov.cn/>

- 371 9. Clinical guideline for COVID-19, version 5. The State Council, The People's  
372 Republic of China. Available from  
373 <http://www.gov.cn/zhengce/zhengceku/2020-02/05/5474791/files/de44557832a>  
374 [d4be1929091dcbcfca891.pdf](http://www.gov.cn/zhengce/zhengceku/2020-02/05/5474791/files/de44557832ad4be1929091dcbcfca891.pdf) [Accessed Feb/29, 2020][in Chinese]
- 375 10. Ministry of Health, Labour and Welfare, Japan.  
376 <https://www.mhlw.go.jp/index.html> [in Japanese]
- 377 11. 2020 Hubei lockdowns, Wikipedia.  
378 [https://en.wikipedia.org/wiki/2020\\_Hubei\\_lockdowns](https://en.wikipedia.org/wiki/2020_Hubei_lockdowns)
- 379 12. Li R,a Weiskittel AR,a Kershaw Jr, JA. **Modeling annualized occurrence,**  
380 **frequency, and composition of ingrowth using mixed-effects zero-inflated**  
381 **models and permanent plots in the Acadian Forest Region of North**  
382 **America.** *Can J For Res.* 2011; 41:2077–2089
- 383 13. Northeastern University. Laboratory for the Modeling of Biological and Socio -  
384 Technical Systems, 2020. Available online: [https://www.mobs -](https://www.mobs-lab.org/2019ncov.html)  
385 [lab.org/2019ncov.html](https://www.mobs-lab.org/2019ncov.html) (accessed on 22 January 2020).
- 386 14. Huang C, Wang Y, Li X, et al. **Clinical features of patients infected with 2019**  
387 **novel coronavirus in Wuhan, China.** *Lancet.* 2020. pii:  
388 S0140-6736(20)30183-5.

- 389 15. Ghani AC, Donnelly CA, Cox DR, Griffin JT, Fraser C, Lam TH, et al.  
390 **Methods for estimating the case fatality ratio for a novel, emerging**  
391 **infectious disease.** *Am J Epidemiol.* 2005; 162: 479-486
- 392 16. Nishiura H, Klinkenberg D, Roberts M, Heesterbeek JA. **Early epidemiological**  
393 **assessment of the virulence of emerging infectious diseases: a case study of**  
394 **an influenza pandemic.** *PLoS One.* 2009;4(8):e6852. doi:  
395 10.1371/journal.pone.0006852.
- 396 17. Tsuzuki S, Lee H, Miura F, Chan YH, Jung SM, Akhmetzhanov AR, Nishiura H.  
397 **Dynamics of the pneumonic plague epidemic in Madagascar, August to**  
398 **October 2017.** *Euro Surveill.* 2017;22(46). doi:  
399 10.2807/1560-7917.ES.2017.22.46.17-00710.
- 400 18. Mizumoto K, Chowell G. **Estimating the risk of 2019 Novel Coronavirus**  
401 **death during the course of the outbreak in China, 2020.** *Emerg Infect Dis.*  
402 2020. Accepted.
- 403 19. Gamerman, D. & Lopes, H. F. **Markov Chain Monte Carlo: Stochastic**  
404 **Simulation for Bayesian Interference.** 2nd edn (Chapman & Hall/CRC, 2006).
- 405 20. Gelman, A. & Rubin, D. B. **Inference from iterative simulation using**  
406 **multiple sequences.** *Stat Sci* 7:457-472, doi:10.1214/ss/1177011136 (1992).

- 407 21. Li Q, Guan X, et. al. **Early Transmission Dynamics in Wuhan, China, of**  
408 **Novel Coronavirus–Infected Pneumonia.** *N Engl J Med.* 2020 Jan 29. DOI:  
409 10.1056/NEJMoa2001316 Available at:  
410 <https://www.nejm.org/doi/full/10.1056/NEJMoa2001316>
- 411 22. Read JM, Bridgen JR, Cummings DA, Ho A, Jewell CP. **Novel coronavirus**  
412 **2019-nCoV: early estimation of epidemiological parameters and epidemic**  
413 **predictions.** *medRxiv.* doi: <https://doi.org/10.1101/2020.01.23.20018549>
- 414 23. Imai N, Cori A, Dorigatti I, Baguelin M, Donnelly CA, Riley S, Ferguson NM.  
415 **Report 3: Transmissibility of 2019-nCoV.**  
416 [https://www.imperial.ac.uk/media/imperial-college/medicine/sph/ide/gida-fello](https://www.imperial.ac.uk/media/imperial-college/medicine/sph/ide/gida-fellowships/Imperial-2019-nCoV-transmissibility.pdf)  
417 [wships/Imperial-2019-nCoV-transmissibility.pdf](https://www.imperial.ac.uk/media/imperial-college/medicine/sph/ide/gida-fellowships/Imperial-2019-nCoV-transmissibility.pdf)
- 418 24. Mizumoto K, Chowell G. **Transmission potential of the novel coronavirus**  
419 **(COVID-19) onboard the Diamond Princess Cruises Ship, 2020.** *Infect Dis*  
420 *Model.* 2020. 264-270
- 421 25. Tariq A, Lee Y, Roosa K, Blumberg S, Yan P, Ma S, Chowell G. **Real-time**  
422 **monitoring the transmission potential of COVID-19 in Singapore, February**  
423 **2020.** *medRxiv.* doi: <https://doi.org/10.1101/2020.02.21.20026435>

- 424 26. Shim E, Tariq A, Choi W, Lee Y, Chowell G. **Transmission potential of**  
425 **COVID-19 in South Korea.** *medRxiv*.  
426 doi:<https://doi.org/10.1101/2020.02.27.20028829>
- 427 27. Chowell G, Abdirizak F, Lee S, Lee J, Jung E, Nishiura H, Viboud C.  
428 **Transmission characteristics of MERS and SARS in the healthcare setting:**  
429 **a comparative study.** *BMC Med.* 2015;**13**:210. doi:  
430 10.1186/s12916-015-0450-0.
- 431 28. Abdirizak F, Lewis R, Chowell G. **Evaluating the potential impact of targeted**  
432 **vaccination strategies against severe acute respiratory syndrome**  
433 **coronavirus (SARS-CoV) and Middle East respiratory syndrome**  
434 **coronavirus (MERS-CoV) outbreaks in the healthcare setting.** *Theor Biol*  
435 *Med Model.* 2019;**16**(1):16. doi: 10.1186/s12976-019-0112-6.
- 436 29. Blake Essig, Brent Swails, Yoko Wakatsuki and Ben Westcott, CNN. **Top**  
437 **Japanese government adviser says Diamond Princess quarantine was**  
438 **flawed.** Updated 0708 GMT (1508 HKT) February 27, 2020.  
439 <https://edition.cnn.com/2020/02/27/asia/japan-diamond-princess-quarantine-cre>  
440 [w-intl-hnk/index.html](https://www.intl-hnk.com/index.html)

- 441 30. Da-hae P, Dam-eun S, Jae-gu K. HANKYOREH. **The reasons why**  
442 **transmission is so prevalent among Shincheonji members.** Mar 2, 2020.  
443 [http://english.hani.co.kr/arti/english\\_edition/e\\_national/930749.html](http://english.hani.co.kr/arti/english_edition/e_national/930749.html) [Accessed  
444 Mar/10, 2020]
- 445 31. Mizumoto K, Kagaya K, Zarebski A, Chowell G. **Estimating the**  
446 **Asymptomatic Proportion of 2019 Novel Coronavirus onboard the Princess**  
447 **Cruises Ship, 2020.** *Euro Surveill.* 2020. Accepted.
- 448 32. Wang D, Hu B, Hu C, Zhu F, Liu X, Zhang J, et al. **Clinical Characteristics of**  
449 **138 Hospitalized Patients With 2019 Novel Coronavirus-Infected**  
450 **Pneumonia in Wuhan, China.** *JAMA.* 2020. doi: 10.1001/jama.2020.1585.
- 451 33. Mizumoto K, Endo A, Chowell G, Miyamatsu Y, Saitoh M, Nishiura H.  
452 **Real-time characterization of risks of death associated with the Middle East**  
453 **respiratory syndrome (MERS) in the Republic of Korea, 2015.** *BMC Med.*  
454 2015;**13**:228. doi: 10.1186/s12916-015-0468-3.
- 455 34. Mizumoto K, Saitoh M, Chowell G, Miyamatsu Y, Nishiura H. **Estimating the**  
456 **risk of Middle East respiratory syndrome (MERS) death during the course**  
457 **of the outbreak in the Republic of Korea, 2015.** *Int J Infect Dis.* 2015;**39**:7-9.  
458 doi: 10.1016/j.ijid.2015.08.005.



- 459 35. J.Y. Wong, P. Wu, H. Nishiura, E. Goldstein, E.H. Lau, L. Yang, et al. **Infection**  
460 **fatality risk of the pandemic A(H1N1)2009 virus in Hong Kong.** *Am J*  
461 *Epidemiol.* 2013;**177 (8)**:pp. 834-840
- 462 36. Presanis AM, De Angelis D; New York City Swine Flu Investigation Team,  
463 Hagy A, Reed C, Riley S, Cooper BS, et al. **The severity of pandemic H1N1**  
464 **influenza in the United States, from April to July 2009: a Bayesian analysis.**  
465 *PLoS Med.* 2009;**6(12)**:e1000207.  
466

## 467 **Figures**

### 468 **Figure 1. Observed and posterior estimates of the daily new cases and**

### 469 **cumulative cases of the COVID-19 cases in Wuhan, China, 2019–2020**

470 Observed and posterior estimates of laboratory–confirmed reported cases (A) and

471 cumulative reported cases (B) are presented.

472 Observed data are presented in the dot, while dashed line indicates 50 percentile, and

473 areas surrounded by light grey and deep grey indicates 95% and 50% credible intervals

474 (CrI) for posterior estimates, respectively. Epidemic day 1 corresponds to the day that

475 starts at January 1<sup>st</sup>, 2020.

476

### 477 **Figure 2. Observed and posterior estimates of the cumulative deaths of the**

### 478 **COVID-19 in Wuhan, China, 2019–2020**

479 Observed and posterior estimates of the cumulative deaths of the COVID-19 in Wuhan

480 is presented. Observed data are presented in the dot, while dashed line indicates 50

481 percentile, and areas surrounded by light grey and deep grey indicates 95% and 50%

482 credible intervals (CrI) for posterior estimates, respectively. Epidemic day 1

483 corresponds to the day that starts at January 1<sup>st</sup>, 2020.

484

### 485 **Figure 3. Temporal variation of the infection fatality risks caused by COVID-19 in**

### 486 **Wuhan, China, 2019–2020**

487

488 (A) Posterior estimates of crude infection fatality ratio in Wuhan City. (B) Posterior  
489 estimates of time–delay adjusted infection fatality ratio in Wuhan City.  
490 Black dots shows observed data, and light and dark indicates 95% and 50% credible  
491 intervals for posterior estimates, respectively. Epidemic day 1 corresponds to the day  
492 that starts at January 1<sup>st</sup>, 2020.  
493

494 **Figure S1. Observed daily new cases and posterior estimates of the daily new**

495 **infections of the COVID-19 in Wuhan, China, 2019–2020**

496 Observed daily new cases and posterior estimates of infections of the COVID-19 are  
497 presented.

498 Observed data are presented in the dot, while dashed line indicates 50 percentile, and  
499 areas surrounded by light grey and deep grey indicates 95% and 50% credible intervals  
500 (CrI) for posterior estimates, respectively. Epidemic day 1 corresponds to the day that  
501 starts at January 1<sup>st</sup>, 2020.

502

503 **Figure S2. Temporal variation of the case fatality risks caused by COVID-19 in**  
504 **Wuhan, China, 2019–2020**

505 (A) Observed and posterior estimates of crude case fatality ratio in Wuhan City, (B)

506 Observed crude case fatality ratio and posterior estimates of time–delay adjusted CFR  
507 in Wuhan City.

508 This figure is submitted to the ref [18]. The purpose of the study is to compare the case  
509 fatality ration (CFR. Not IFR) in three different areas (Wuhan City, in Hubei Province  
510 excluding Wuhan City and in China excluding Hubei Province) to interpret the current  
511 severity of the epidemic in China, and the purpose is different from this study.

512

513

514 **Tables**

515 Table 1 – Death risk by COVID-19 in Wuhan City, China, 2020 (As of  
516 February 12, 2020)

| Death Risk              | Latest estimate                         | Range of median estimates |
|-------------------------|-----------------------------------------|---------------------------|
| Crude CFR (Observed)    | 4.19%                                   | 2.0 – 9.0%                |
| Crude CFR (Estimated)   | 4.2% (95%CrI <sup>‡</sup> : 3.9 – 4.9%) | 3.4 – 7.2%                |
| Time delay adjusted CFR | 12.2% (95%CrI: 11.4 – 13.0%)            | 4.1 – 34.8%               |
| Crud IFR                | 0.04% (95%CrI: 0.03 – 0.06%)            | 0.02 – 0.07%              |
| Time delay adjusted IFR | 0.12% (95%CrI: 0.08 – 0.17%)            | 0.04 – 0.33%              |

517 CrI: Credibility intervals, CFR: Case fatality ratio, IFR: Infection fatality  
518 ratio

519 <sup>‡</sup>Upper and lower 95% credibility interval

520

**A** Observed and estimated number of reported cases  
Wuhan

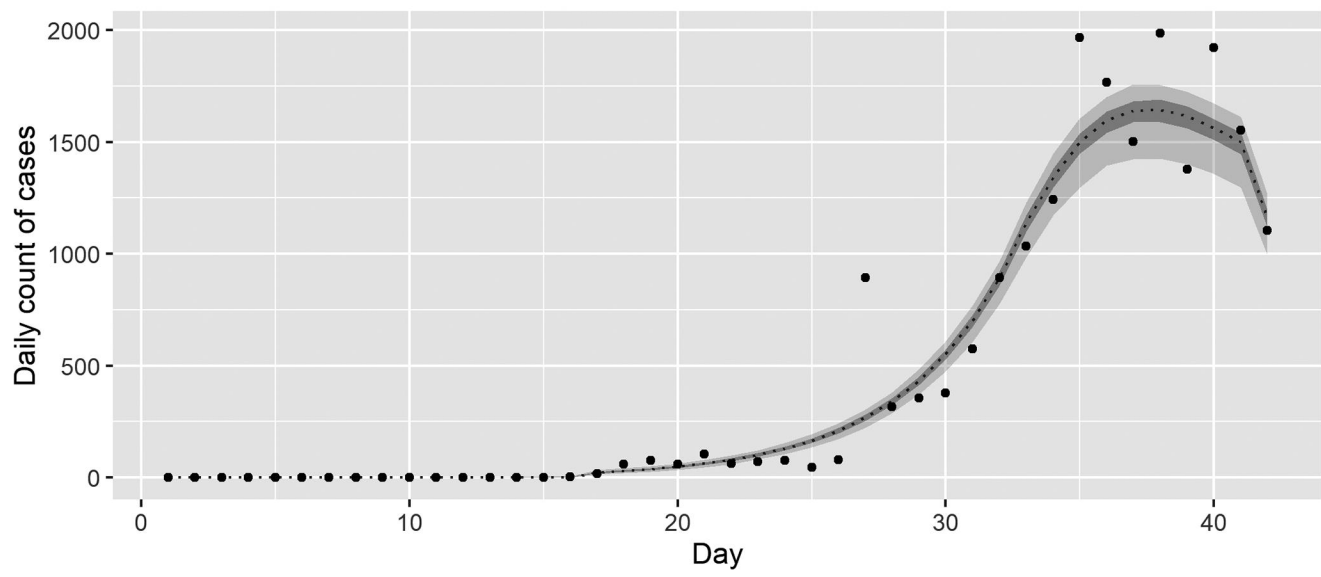

**B** Observed and estimated number of cumulative reported cases  
Wuhan

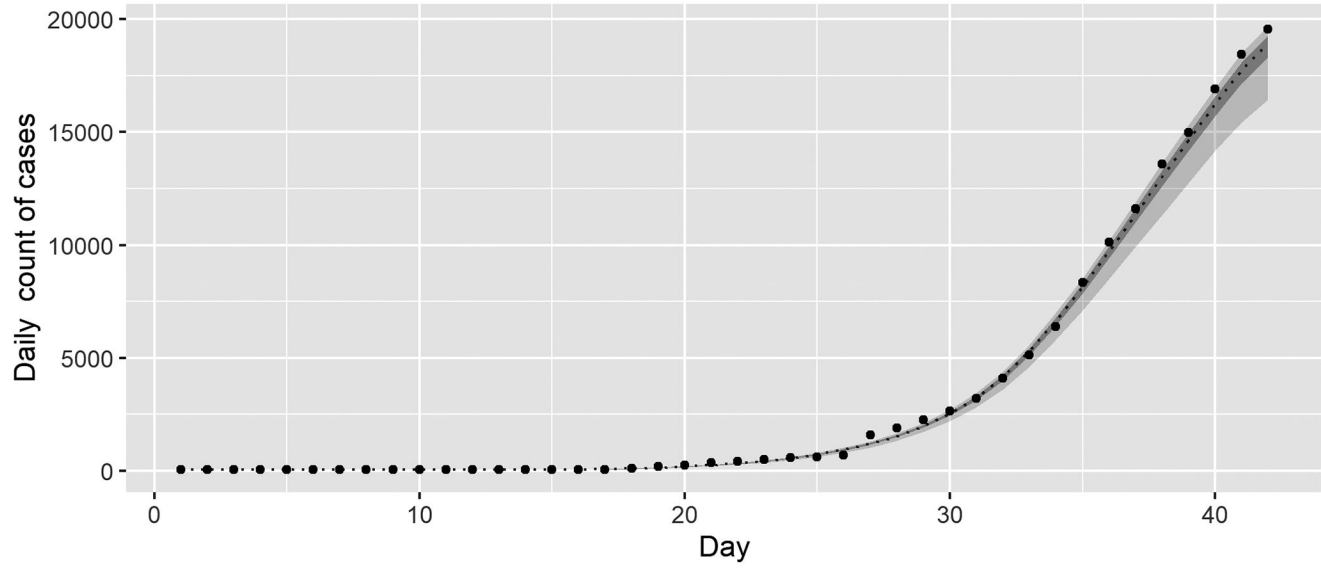

# Observed and estimated number of reported cumulative death Wuhan

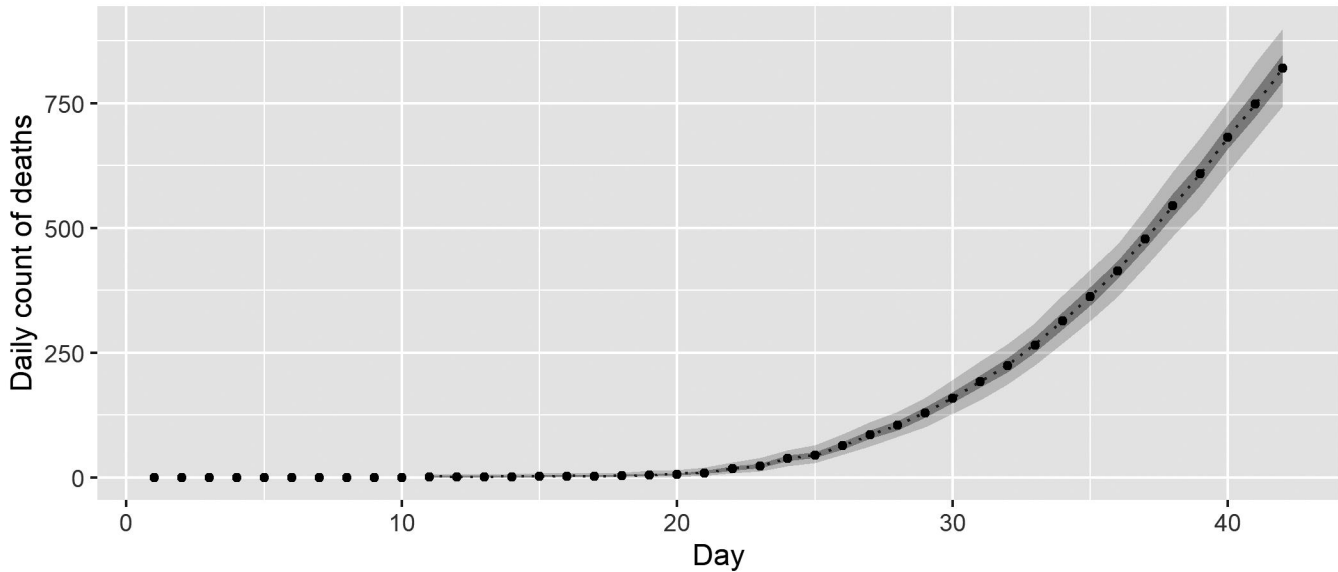

**A** Infection fatality ratio  
Crude  
Wuhan

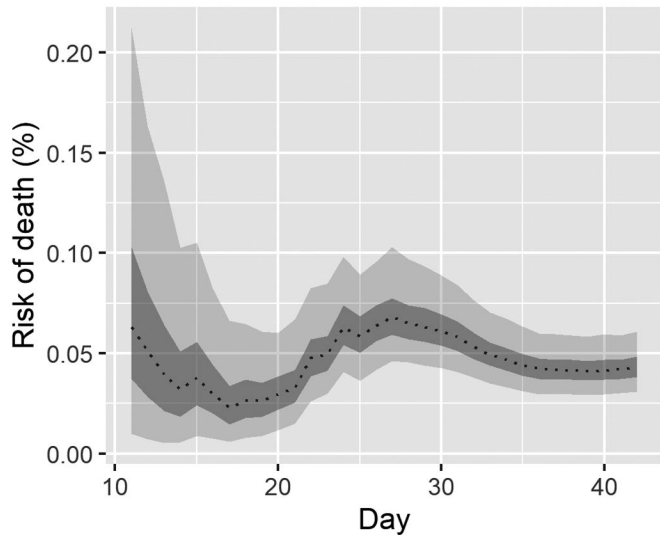

**B** Infection fatality ratio  
Time-delay adjusted  
Wuhan

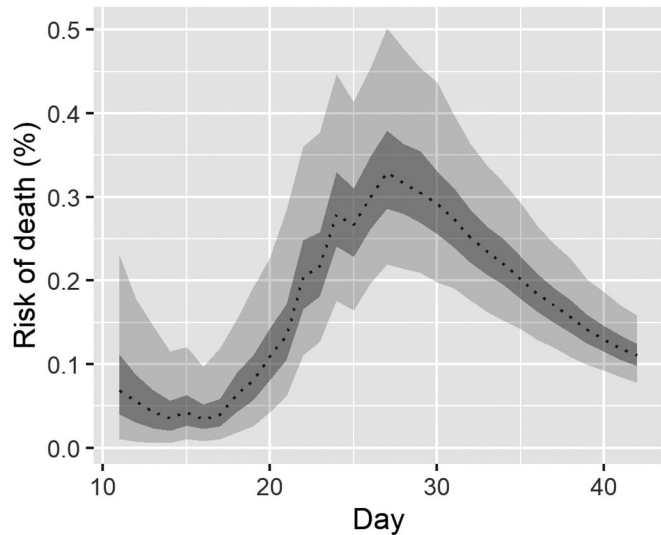

Source: https://www.medrxiv.org/content/medrxiv/early/2020/03/13/2020.02.12.20022434.full.pdf
